# Supplementary material
Source: publisher figshare collection journal article supplement (https://aacr.figshare.com/articles/dataset/_/22454675)
Supplement: Supplementary file 1 [file 39905795]

**Supplementary Table S1. Clinical features of 20 HCC patients for Affymetrix genechip analysis**

| <b>Variable</b>                              | <b>All patients<br/>(n = 20)</b> | <b>IL28B TT genotype<br/>(n = 10)</b> | <b>IL28B TG/GG genotype<br/>(n = 10)</b> | <b>p value</b> |
|----------------------------------------------|----------------------------------|---------------------------------------|------------------------------------------|----------------|
| Sex (male:female)                            | 15:5                             | 4:6                                   | 1:9                                      | N.S.           |
| Age (years)                                  | 65.5 (47–78)                     | 70 (47–78)                            | 60 (49–75)                               | N.S.           |
| Platelet count ( $\times 10^4/\text{mm}^3$ ) | 11.1 (6.2–20.2)                  | 11 (6.2–20.2)                         | 12.9 (7.8–17.8)                          | N.S.           |
| ALT (IU/L)                                   | 38.5 (15–150)                    | 38 (20–116)                           | 39 (15–150)                              | N.S.           |
| $\gamma$ GTP (IU/L)                          | 36.5 (17–399)                    | 41 (17–120)                           | 33.5 (23–399)                            | N.S.           |
| Albumin (g/dL)                               | 4.2 (3.1–4.8)                    | 4.2 (3.4–4.8)                         | 4.1 (3.1–4.6)                            | N.S.           |
| Prothrombin activity (%)                     | 86.5 (58–115)                    | 86.5 (64–100)                         | 86.5 (58–115)                            | N.S.           |
| Total bilirubin (mg/dL)                      | 0.7 (0.2–1.5)                    | 0.75 (0.6–1.5)                        | 0.7 (0.2–1.4)                            | N.S.           |
| Cirrhosis (yes:no)                           | 12:8                             | 7:3                                   | 5:5                                      | N.S.           |
| History of IFN therapy (yes:no)              | 9:11                             | 4:6                                   | 5:5                                      | N.S.           |
| Child-Pugh class (A:B)                       | 19:1                             | 9:1                                   | 10:0                                     | N.S.           |
| Tumor no. (1:2:3)                            | 16:1:3                           | 9:1:0                                 | 7:0:3                                    | N.S.           |
| Tumor size (mm)                              | 31.5 (14–62)                     | 34 (14–62)                            | 28.5 (17–38)                             | N.S.           |
| AFP (ng/mL)                                  | 16.5 (<10–5507)                  | 10 (<10–3490)                         | 39 (<10–5507)                            | N.S.           |
| DCP (AU/L)                                   | 51.5 (<10–19360)                 | 48.5 (<10–188)                        | 304 (<10–19360)                          | N.S.           |

Data shown as medians (range)

ALT, alkaline phosphatase;  $\gamma$ GTP, gamma-glutamyl transpeptidase; IFN, interferon; AFP, alpha-fetoprotein; DCP, des-gamma-carboxy prothrombin.

N.S., not significant

**Supplementary Table S2. The list of Probe ID of genes for hierarchical clustering**

| A) Interferon stimulated genes (ISG) |                         | B) Immune response related genes |                         |
|--------------------------------------|-------------------------|----------------------------------|-------------------------|
| Gene symbol                          | Affymetrix Probe Set ID | Gene symbol                      | Affymetrix Probe Set ID |
| HERC6                                | 219352_at               | ZAP70                            | 214032_at               |
| PLSCR1                               | 202446_s_at             | IL27RA                           | 205926_at               |
| DDX60L                               | 228152_s_at             | SEMA3C                           | 203789_s_at             |
| SP110                                | 209762_x_at             | CX3CL1                           | 203687_at               |
| DDX58                                | 218943_s_at             | SECTM1                           | 213716_s_at             |
| TRIM69                               | 1568592_at              | LTF                              | 202018_s_at             |
| NMI                                  | 203964_at               | CTSC                             | 201487_at               |
| TDRD7                                | 213361_at               | FCGR1A                           | 216951_at               |
| IFITM1                               | 214022_s_at             | PSMB10                           | 202659_at               |
| OAS1                                 | 202869_at               | ARHGDIB                          | 201288_at               |
| IFIT2                                | 217502_at               | CCL5                             | 204655_at               |
| RTP4                                 | 219684_at               | GZMA                             | 205488_at               |
| MX1                                  | 202086_at               | CD74                             | 1567627_at              |
| IFI44L                               | 204439_at               | IL2RG                            | 204116_at               |
| OAS2                                 | 204972_at               | FYB                              | 205285_s_at             |
| ISG15                                | 205483_s_at             | AIM2                             | 206513_at               |
| RSAD2                                | 213797_at               | FCN1                             | 205237_at               |
| CMPK2                                | 226702_at               | NCF4                             | 205147_x_at             |
| EPST11                               | 227609_at               | FCGR3B                           | 204007_at               |
| IFI44                                | 214453_s_at             | CTSS                             | 202902_s_at             |
| USP18                                | 219211_at               | CCR1                             | 205099_s_at             |
| SAMD9                                | 228531_at               | CD86                             | 205686_s_at             |
| HERC5                                | 219863_at               | LY86                             | 205859_at               |
| ARP9                                 | 223220_s_at             | TLR8                             | 220832_at               |
| IFIH1                                | 219209_at               | CMKLR1                           | 207652_s_at             |
| NT5C3                                | 223298_s_at             | IGSF6                            | 206420_at               |
| PNPT1                                | 225291_at               | TLR7                             | 220146_at               |
| OAS3                                 | 218400_at               | CXCL13                           | 205242_at               |
|                                      |                         | PTGER4                           | 204896_s_at             |
|                                      |                         | TRAT1                            | 217147_s_at             |
|                                      |                         | CRTAM                            | 206914_at               |
|                                      |                         | CD22                             | 220674_at               |
|                                      |                         | CCL21                            | 204606_at               |
|                                      |                         | CCL19                            | 210072_at               |
|                                      |                         | MS4A1                            | 228599_at               |
|                                      |                         | CHST4                            | 220446_s_at             |
|                                      |                         | CCL4                             | 204103_at               |
|                                      |                         | CIITA                            | 205101_at               |
|                                      |                         | LCP2                             | 205270_s_at             |
|                                      |                         | CD28                             | 206545_at               |
|                                      |                         | LAX1                             | 207734_at               |
|                                      |                         | CST7                             | 210140_at               |
|                                      |                         | CTSW                             | 214450_at               |
|                                      |                         | FCGRT                            | 218831_s_at             |
|                                      |                         | TAPBP                            | 210294_at               |
|                                      |                         | IL32                             | 203828_s_at             |
|                                      |                         | IL1R2                            | 205403_at               |
|                                      |                         | PRELID1                          | 224232_s_at             |
|                                      |                         | GBP2                             | 202748_at               |
|                                      |                         | CTLA4                            | 221331_x_at             |
|                                      |                         | IL2RA                            | 206341_at               |
|                                      |                         | IL12B                            | 207901_at               |

**Supplementary Table S3. Differentially expressed gene sets classified with Gene Ontology in HCC tissues of *IL28B* TG/GG genotype ( $p < 0.001$ )**

| <b>Gene set name</b>                              | <b>Z score</b> | <b>p-value</b> |
|---------------------------------------------------|----------------|----------------|
| Immune system process                             | -5.061704462   | 4.16E-07       |
| Cellular defense response                         | -4.758636333   | 1.95E-06       |
| Morphogenesis of an epithelium                    | -3.841568689   | 0.000122251    |
| T cell activation                                 | -3.786068036   | 0.00015305     |
| Locomotory behavior                               | -3.665308511   | 0.000247041    |
| Regulation of T cell activation                   | -3.644238912   | 0.000268184    |
| T cell proliferation                              | -3.595929386   | 0.000323235    |
| Regulation of T cell proliferation                | -3.587277691   | 0.000334148    |
| Cell proliferation                                | -3.536554986   | 0.000405382    |
| Cytokine and chemokine mediated signaling pathway | -3.463535652   | 0.000533126    |
| Positive regulation of T cell proliferation       | -3.417834282   | 0.000631215    |
| Leukocyte activation                              | -3.403132498   | 0.00066618     |
| Lymphocyte activation                             | -3.394307987   | 0.000688023    |
| Mitotic cell cycle                                | -3.388508432   | 0.000702739    |
| Regulation of apoptosis                           | -3.358628985   | 0.000783302    |
| Immune response                                   | -3.328845827   | 0.000872067    |
| Regulation of programmed cell death               | -3.324614535   | 0.000885409    |
| Epithelial cell differentiation                   | -3.302070425   | 0.00095974     |
| Regulation of lymphocyte activation               | -3.294808682   | 0.000984887    |

**Supplementary Table S4. Comparison of tumor infiltrate lymphocyte between *IL28B* TT and TG/GG genotypes**

| <b>Variable</b>                               | <b>IL28B TT genotype<br/>(n=20)</b> | <b>IL28 TG/GG genotype<br/>(n=12)</b> | <b><i>p</i> value</b> |
|-----------------------------------------------|-------------------------------------|---------------------------------------|-----------------------|
| Score of intratumoral lymphocyte infiltration |                                     |                                       |                       |
| CD4 positive                                  | 0.825                               | 1.291                                 | 0.118                 |
| CD8 positive                                  | 1.175                               | 1.750                                 | 0.047                 |

**Supplementary Table S5. Cox regression analysis and relative frequency of variables inclusion with p-value <0.05 (in 1000 bootstrap samples) for early HCC recurrence ( $\leq 1$ year).**

| Variables                                                      | Univariate |               |          | Multivariate |               |          | Frequency (%) |
|----------------------------------------------------------------|------------|---------------|----------|--------------|---------------|----------|---------------|
|                                                                | HR         | 95%CI         | <i>P</i> | HR           | 95%CI         | <i>P</i> |               |
| IL28B allele: TT vs TG/GG                                      | 2.351      | 1.189 - 6.747 | 0.019    | 2.351        | 1.189 - 6.747 | 0.019    | 82.5          |
| DCP (AU/l): >40 vs $\leq 40$                                   | 1.362      | 0.828 - 2.863 | 0.173    |              |               |          | 37.5          |
| ALT (IU/l): >40 vs $\leq 40$                                   | 0.833      | 0.697 - 2.444 | 0.405    |              |               |          | 32            |
| Tumor number: solitary vs 2-3                                  | 0.651      | 0.397 - 1.590 | 0.515    |              |               |          | 29.5          |
| History of IFN therapy: yes vs no                              | 1.127      | 0.768 - 2.658 | 0.260    |              |               |          | 26            |
| $\gamma$ GTP (IU/l): >50 vs $\leq 50$                          | 0.535      | 0.631 - 2.237 | 0.593    |              |               |          | 23            |
| AFP (ng/ml): >20 vs $\leq 20$                                  | 0.804      | 0.694 - 2.400 | 0.421    |              |               |          | 22.5          |
| Child-Pugh class : A vs B                                      | 0.752      | 0.620 - 2.922 | 0.452    |              |               |          | 20.5          |
| Age: per 1 year                                                | 0.951      | 0.981 - 1.056 | 0.342    |              |               |          | 19            |
| Tumor size (mm): >20 vs $\leq 20$                              | 0.403      | 0.601 - 2.164 | 0.687    |              |               |          | 16.5          |
| Platelet count ( $\times 10^4/\text{mm}^3$ ): >10 vs $\leq 10$ | 0.006      | 0.537 - 1.857 | 0.995    |              |               |          | 16            |
| Therapy: RFA vs resection                                      | 0.305      | 0.481 - 2.727 | 0.760    |              |               |          | 15            |
| Period of therapy: 2000-05 vs 2006-11                          | 0.900      | 0.372 - 1.442 | 0.368    |              |               |          | 15            |
| Sex: male vs female                                            | 0.299      | 0.581 - 2.092 | 0.765    |              |               |          | 14.5          |

**Supplementary Table S6. Cox regression analysis and relative frequency of variables inclusion with p-value <0.05 (in 1000 bootstrap samples) for late HCC recurrence (1year<).**

| Variables                                                       | Univariate |               |          | Multivariate |               |          | Frequency (%) |
|-----------------------------------------------------------------|------------|---------------|----------|--------------|---------------|----------|---------------|
|                                                                 | HR         | 95%CI         | <i>P</i> | HR           | 95%CI         | <i>P</i> |               |
| Tumor size (mm): >20 vs ≤20                                     | 1.327      | 0.859 - 2.203 | 0.184    | 1.879        | 0.980 - 2.420 | 0.060    | 59.3          |
| IL28B allele: TT vs TG/GG                                       | 1.587      | 0.914 - 2.354 | 0.113    | 1.717        | 1.033 - 2.684 | 0.086    | 57.3          |
| Tumor number: solitary vs 2-3                                   | 1.931      | 0.993 - 2.585 | 0.054    | 1.976        | 0.998 - 2.674 | 0.048    | 53.8          |
| Therapy: RFA vs resection                                       | 1.256      | 0.801 - 2.758 | 0.209    |              |               |          | 49.8          |
| AFP (ng/ml): >20 vs ≤20                                         | 1.486      | 0.897 - 2.211 | 0.137    |              |               |          | 44.8          |
| Period of therapy: 2000-05 vs 2006-11                           | 1.021      | 0.804 - 1.996 | 0.307    |              |               |          | 44.6          |
| Age: per 1 year                                                 | 0.075      | 0.976 - 1.027 | 0.940    |              |               |          | 38.3          |
| Platelet count (×10 <sup>4</sup> /mm <sup>3</sup> ): >10 vs ≤10 | 0.142      | 0.618 - 1.516 | 0.887    |              |               |          | 38.1          |
| Sex: male vs female                                             | 0.090      | 0.636 - 1.643 | 0.928    |              |               |          | 37.1          |
| γGTP (IU/l): >50 vs ≤50                                         | 1.079      | 0.816 - 2.013 | 0.281    |              |               |          | 34.5          |
| Child-Pugh class : A vs B                                       | 0.581      | 0.702 - 1.920 | 0.561    |              |               |          | 27.1          |
| DCP (AU/l): >40 vs ≤40                                          | 0.875      | 0.770 - 1.981 | 0.381    |              |               |          | 20.2          |
| History of IFN therapy: yes vs no                               | 0.121      | 0.615 - 1.536 | 0.904    |              |               |          | 19.5          |
| ALT (IU/l): >40 vs ≤40                                          | 0.273      | 0.577 - 1.516 | 0.785    |              |               |          | 18.9          |
